# Supplementary material for: Optimizing the output performance and parasitic depletion of Bi2Te3-based thermoelectric generators by using a high-density approach
Source: Royal Society of Chemistry journal article supplement (doi:10.1039/d3ta01342a), 2023-01-01
Supplement: d3ta01342a1.pdf [file d3ta01342a1.pdf]

*Supporting Information*

## Optimizing output performance and parasitic depletion of $\text{Bi}_2\text{Te}_3$ -based thermoelectric generators by using a high-density approach

Yu Tian,<sup>ab</sup> Guang-Kun Ren,<sup>a\*</sup> Zhifang Zhou,<sup>c</sup> Zhijie Wei,<sup>a</sup> Wen Fang,<sup>a</sup> Jiangfeng Song,<sup>a</sup> Yan Shi,<sup>a</sup> Xiaohong Chen,<sup>b\*</sup> Yuan-Hua Lin<sup>c</sup>

<sup>a</sup> Institute of Materials, China Academy of Engineering Physics, Jiangyou, Sichuan, 621908, P. R. China

<sup>b</sup> School of Science and Research Center for Advanced Computation, Xihua University, Chengdu, Sichuan, 610039, P. R. China

<sup>c</sup> State Key Laboratory of New Ceramics and Fine Processing, School of Materials Science and Engineering, Tsinghua University, Beijing, 100084, P. R. China

### Phase composition

The X-ray diffraction patterns of p-type (Bi-Sb-Te) and n-type (Bi-Te-Se) materials are consistent with the R-3m space group with hexagonal layered structures, and no impurities are observed, as marked in Fig. S1.

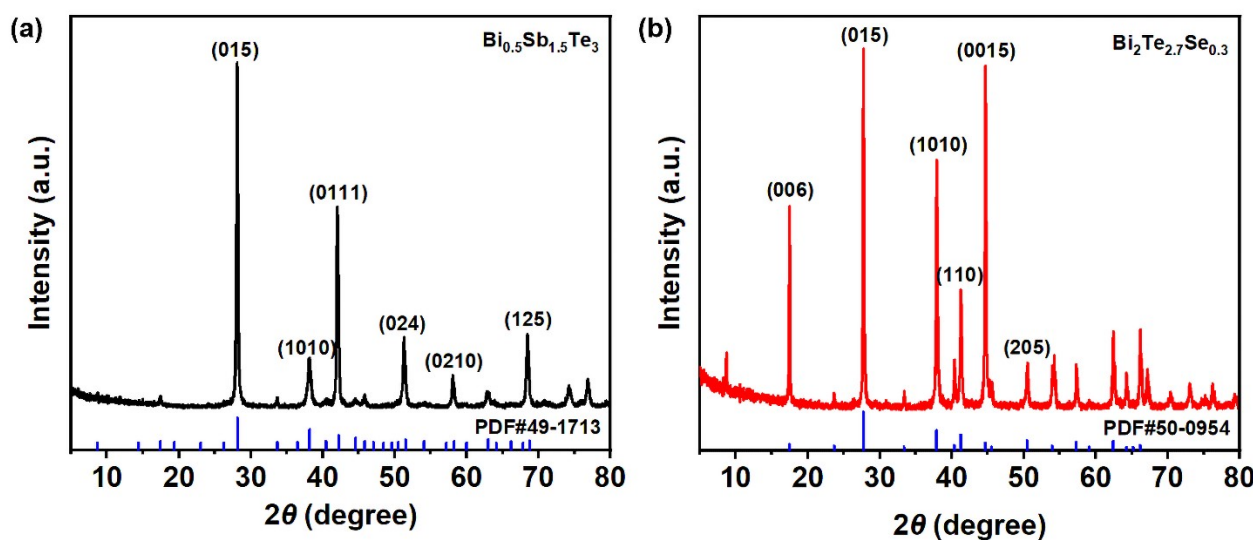

**Fig. S1** Phase characterization diagram of commercial  $\text{Bi}_2\text{Te}_3$ -based thermoelectric materials. The X-ray diffraction patterns of (a) p-type and (b) n-type materials.

**Table S1** The compositions of commercial p- and n-type Bi<sub>2</sub>Te<sub>3</sub>-based materials.

| Element | P-type |       |       | N-type |       |      |
|---------|--------|-------|-------|--------|-------|------|
|         | Bi     | Sb    | Te    | Bi     | Te    | Se   |
| at.%    | 8.92   | 32.77 | 58.31 | 40.35  | 55.92 | 3.73 |
| wt.%    | 14.02  | 30.01 | 55.96 | 53.16  | 44.98 | 1.86 |

### The average Seebeck coefficient in Finite element module

The average Seebeck coefficient values derived from  $\Delta U$ - $\Delta T$  curves can be used to verify the commercial materials, and as shown in Fig. S2.

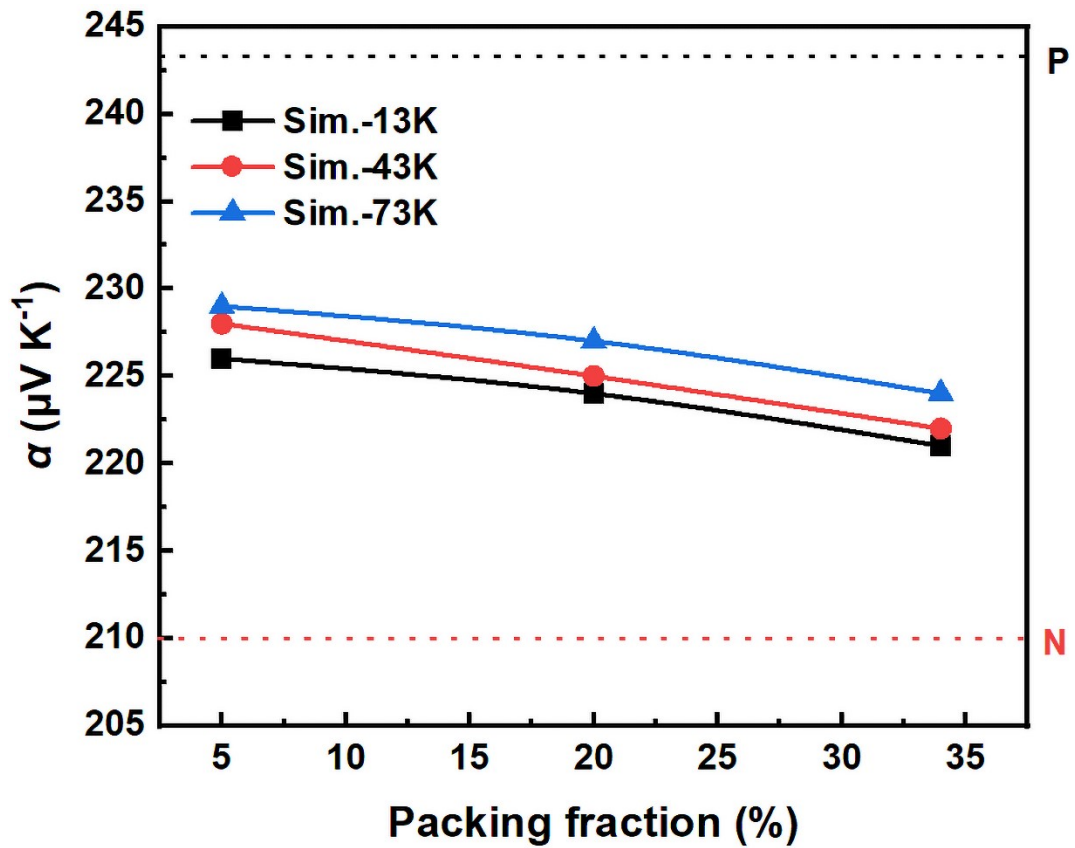

**Fig. S2** Packing fraction dependence of average Seebeck coefficient values of 200-Tcs ( $f = 20\%$ ), 50-Tcs ( $f = 5\%$ ) and 50-Tcs ( $f = 34\%$ ) TEGs at different  $\Delta T$ .

### Experimental contact resistivity used for V-TDE

To shed more light on the parasitic depletion, especially for contact depletion, systematic characterizations of  $r_c$  have been done based on a four-probe method, and the calculated  $\rho_c$  has been introduced into the V-TDE, As shown in Fig. S3(a)-(b).

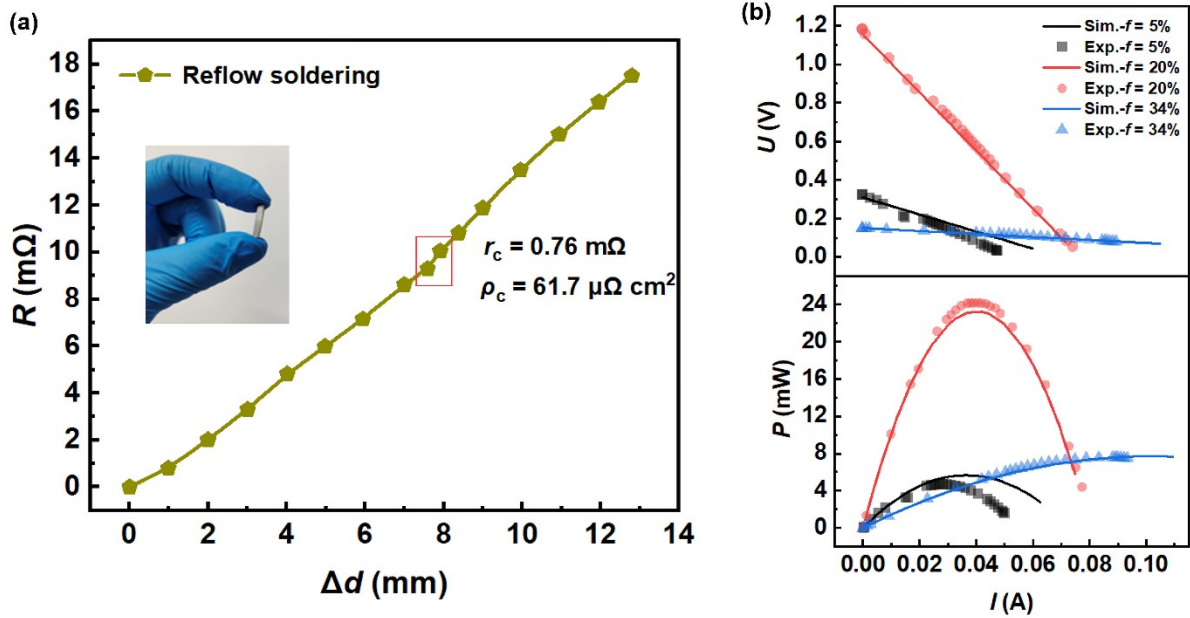

**Fig. S3** (a) The electrical contact resistance ( $r_c$ ) of typical reflow soldering sample, and (b) the simulation and experimental value of TEGs ( $f$ : 5%, 20% and 34%).

### 338-Tcs TEG with destroyed linear relationship between $P_{\max}$ and $f$

For low temperature environment, the TEG possesses outstanding performance by remaining the maximum effective  $\Delta T$ , however, the ability would be weakened at high temperatures, resulting in higher average temperature of each leg, larger internal resistance, and lower open-circuit voltage than liner values. And the average Seebeck coefficient values are within the range made by p- and n-type materials at  $\Delta T$  of 13 K and 43K, yet they are below those at  $\Delta T$  of 73 K, as shown in Fig. S4 (a) and (b).

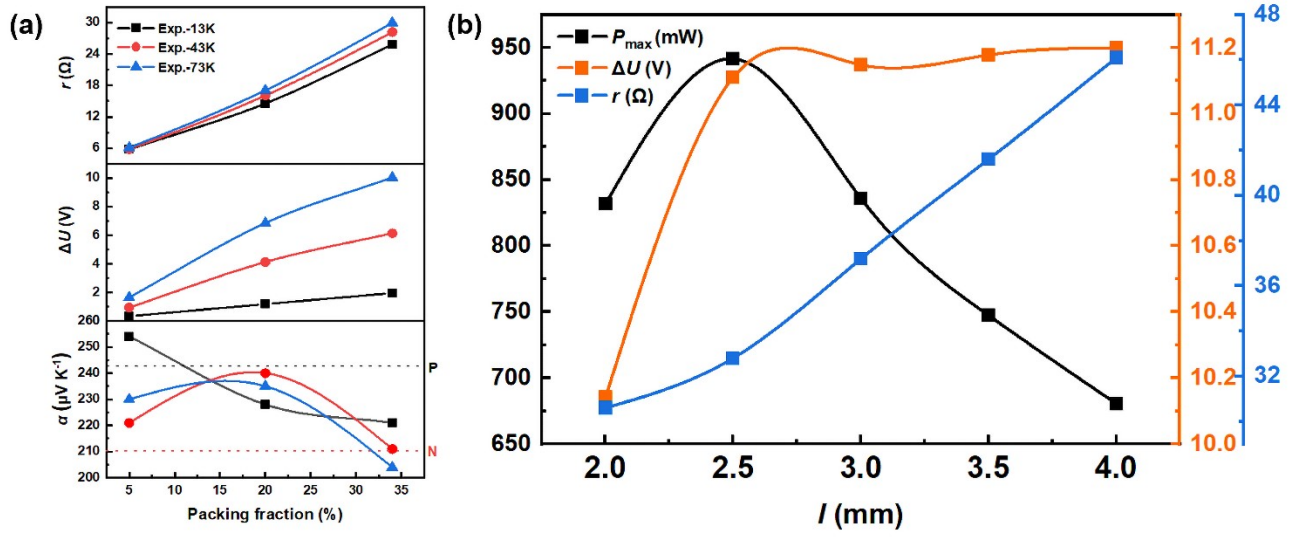

**Fig. S4** (a) Packing fraction dependence of  $r$ ,  $\Delta U$  and average Seebeck coefficient values of 50-Tcs ( $f = 5\%$ ), 200-Tcs ( $f = 20\%$ ) and 338-Tcs ( $f = 34\%$ ) TEGs at different  $\Delta T$ . (b) The leg height ( $l$ ) dependence of  $P_{max}$ ,  $\Delta U$  and  $r$  of 338-Tcs TEG between 293K and 366K.
